# Supplementary material for: Trends in Disparities and Transitions of Treatment in Patients With Early Breast Cancer in China and the US, 2011 to 2021
Source: PubMed Central journal article supplement (PMC10314317; doi:10.1001/jamanetworkopen.2023.21388), 2023-06-30
Supplement: jamanetwopen-e2321388-s002.pdf [file jamanetwopen-e2321388-s002.pdf]

\*First name, last name, and suffix (if applicable) are required and will appear in PubMed.

| <b>*Group Name(s): Chinese Society of Clinical Oncology Breast Cancer Committee Database Collaborative Group</b> |                   |                              |                  |                                                                                                        |                                          |                                                         |                                                                                            |
|------------------------------------------------------------------------------------------------------------------|-------------------|------------------------------|------------------|--------------------------------------------------------------------------------------------------------|------------------------------------------|---------------------------------------------------------|--------------------------------------------------------------------------------------------|
| <b>*First Name and Middle Initial(s)</b>                                                                         | <b>*Last Name</b> | <b>*Suffix (eg, Jr, III)</b> | Academic Degrees | Institution                                                                                            | Location (city, state/province, country) | Role or Contribution, eg, chair, principal investigator | Group (if more than 1 Group listed in the byline) and/or Subgroup (eg, Steering Committee) |
| Yunjiang                                                                                                         | Liu               |                              |                  | The Fourth Affiliated Hospital of Hebei Medical University                                             | Shijiazhuang, Hebei, China               | principal investigator                                  |                                                                                            |
| Yuhua                                                                                                            | Song              |                              |                  | Qingdao University Medical school affiliated hospital                                                  | Qingdao, Shandong, China                 | principal investigator                                  |                                                                                            |
| Min                                                                                                              | Yan               |                              |                  | Henan Breast Cancer Center, Affiliated Cancer Hospital of Zhengzhou University & Henan Cancer Hospital | Zhennzhou, Henan, China                  | principal investigator                                  |                                                                                            |
| Qianjun                                                                                                          | Chen              |                              |                  | Guangdong Provincial Hospital of Traditional Chinese Medicine                                          | Guangzhou, Guangdong, China              | principal investigator                                  |                                                                                            |
| Ying                                                                                                             | Lin               |                              |                  | The First Affiliated Hospital of Sun Yat sen University                                                | Guangzhou, Guangdong, China              | principal investigator                                  |                                                                                            |
| Qiang                                                                                                            | Liu               |                              |                  | Sun Yat sen University Affiliated Sun Yat sen Memorial Hospital                                        | Guangzhou, Guangdong, China              | principal investigator                                  |                                                                                            |
| Feng                                                                                                             | Jin               |                              |                  | The First Affiliated Hospital of China Medical University                                              | Shenyang, Liaoning, China                | principal investigator                                  |                                                                                            |
| Yuee                                                                                                             | Teng              |                              |                  | The First Affiliated Hospital of China Medical University                                              | Shenyang, Liaoning, China                | principal investigator                                  |                                                                                            |
| Peifen                                                                                                           | Fu                |                              |                  | The First Affiliated Hospital of Zhejiang University                                                   | Hangzhou, Zhejiang, China                | principal investigator                                  |                                                                                            |
| Jianguo                                                                                                          | Zhang             |                              |                  | The Second Hospital affiliated to Harbin Medical University                                            | Harbin, Heilongjiang, China              | principal investigator                                  |                                                                                            |
| Zhigao                                                                                                           | Li                |                              |                  | Heilongjiang Cancer Hospital                                                                           | Harbin, Heilongjiang, China              | principal investigator                                  |                                                                                            |
| Yiding                                                                                                           | Chen              |                              |                  | The Second Affiliated Hospital of Zhejiang University                                                  | Hangzhou, Zhejiang, China                | principal investigator                                  |                                                                                            |

Supplemental Online Content: Nonauthor Collaborators

\*First name, last name, and suffix (if applicable) are required and will appear in PubMed.

| <b>*First Name and Middle Initial(s)</b> | <b>*Last Name</b> | <b>*Suffix (eg, Jr, III)</b> | Academic Degrees | Institution                | Location (city, state/province, country) | Role or Contribution, eg, chair, principal investigator | Group (if more than 1 Group listed in the byline) and/or Subgroup (eg, Steering Committee) |
|------------------------------------------|-------------------|------------------------------|------------------|----------------------------|------------------------------------------|---------------------------------------------------------|--------------------------------------------------------------------------------------------|
| Kun                                      | Wang              |                              |                  | Guangdong Cancer Hospital  | Guangzhou, Guangdong, China              | principal investigator                                  |                                                                                            |
| Yongmei                                  | Yin               |                              |                  | Jiangsu Province Hospital  | Nanjing, Jiangsu, China                  | principal investigator                                  |                                                                                            |
| Xiaoming                                 | Zha               |                              |                  | Jiangsu Province Hospital  | Nanjing, Jiangsu, China                  | principal investigator                                  |                                                                                            |
| Haiqing                                  | Zhang             |                              |                  | Central Hospital of Dalian | Dalian, Liaoning, China                  | principal investigator                                  |                                                                                            |
